# Supplementary material
Source: Research Square preprint supplement (doi:10.21203/rs.3.rs-9057970/v1)
Supplement: Supplementary file 1 [file a0cde64fd9e8de4760fecd35.docx]

**Appendix A**

| **No.** | **Title of articles** | **Author, year of publication** | **Geographical distribution** | **Participants Age (Average or range)** | **Participants Category (n)** | **Digital components / functional elements** | **Well-being issues** | **Methods** |
| --- | --- | --- | --- | --- | --- | --- | --- | --- |
| 1 | Smartphone Use and Psychological Well-Being Among College Students in China: A Qualitative Assessment | (21) | 7 colleges in China | Not mentioned | Undergraduate (70) | 1. Nomophobia (smartphone addiction) / Fear of missing out (FOMO) 2. Smartphone use late night 3. Smartphone high dependency 4. Individual goal setting 5. Mental focus | 1. Anxiety, insecure, panic, disconnected (Nomophobia)  2. Disturbed sleep quality (Smartphone use late night) 3. less self-control / higher disturbances (Smartphone high dependency) | Quali |
| 2 | Studying problems, not problematic usage: Do mobile checking habits increase procrastination and decrease well-being? | (26) | Johannes Gutenberg University of Mainz, Germany. | 23 | Undergraduate  (532) | Mobile checking habit | Procrastination, lower well-being | Quanti |
| 3 | Teaching and learning "Digital Wellbeing" | (27) | Politecnico di Torino, Italy. | 21 | Undergraduate  (102) | 1. Educational course on DWB (Benessere Digitale course) 2. Digital literacy 3. Tech company support 4. Screen time | 1. Satisfaction (Educational course)  2. No effect on Well-being (Screen time) | Mixed. Case study |
| 4 | Problematic use of the internet, smartphones, and social media among medical students and relationship with depression: An exploratory study | (22) | Mbarara University of Science and Technology (MUST), Uganda | 23.37 ± 3.38 | Medical Undergraduate (269) | Internet addiction, social media addiction, smartphone addiction | Depression | Quanti |
| 5 | Designing and implementing virtual education course of media literacy for medical sciences students: An experimental study | (39) | Shahid Sadoughi University of Medical Sciences, Yazd Iran | 19-30 | Undergraduate (27)  & Postgraduate (61) | 1. Accessibility 2. Analyzing skills 3. Communication skills 4. Think critically about content (All are media literacy) | Not mentioned | Experimental study, quanti |
| 6 | Exploring the impact of the covid-19 pandemic on university students’ learning life: An integrated conceptual motivational model for sustainable and healthy online learning | (28) | Few Public & private universities in Malaysia | 18-28 | Undergraduate (419)  &  Postgraduate (67) | 1. Sudden online (adaptability) 2. Digital literacy 3. Screen time 4. Family support 5. University support | 1. Stress, anxiety (Sudden online, screen time, family support, university support)  2. Losing temper easily. (Sudden online)  3. Increase Motivation (Digital literacy, family support) | Mixed quali quanti |
| 7 | Design an Adaptive Mobile Scaffolding System According to Students’ Cognitive Style Simplicity vs Complexity for Enhancing Digital Well-Being | (50) | Saudi Arabia | Not mentioned | Undergraduate  (71) | 1. Specified mobile scaffolding according to cognitive style (educational application) | 1. Increase motivation, self satisfaction, students' control | Mixed. Quasi-experimental |
| 8 | Defining Digital Wellbeing Literacy in Remote Work Integrated Learning | (40) | Australian-based University Business School. | Not mentioned | Undergraduate (6)  -Others are Higher education staff) | 1. Digital wellbeing literacy capability 2. Language - wellbeing literacy (communication skill) 3. Flexibility (not to show face) 4. Emoji - language 5. Goal - Help seeking | 1. Less confident / confident (literacy capability) 2. Comfortable / confident with stranger (Flexibility) 3. Help in expression / positive atmosphere (Emoji) 4. Relieve stress (Goal – Help seeking) | Quali |
| 9 | Use of digital self-control tools in higher education – a survey study | (52) | 1 institute in Germany | 27.18 | Undergraduate  (219)  &  Postgraduate (54) | 1. Digital self-control tools (app) 2. Screen share (one of digital self-control tool | 1. Anxiety, stress -More distraction than assistance (Digital self-control tools) | Mixed quanti quali |
| 10 | Digital proficiency and psychological well-being in online learning: Experiences of first-generation college students and their peers | (44) | Public university on the west coast of the United States | Not mentioned | Undergraduate (309) | 1. Digital Proficiency  2. Interactive features | 1. Positive psychological wellbeing | Quanti |
| 11 | “Seeing and Being Seen” or Just “Seeing” in a Smart Classroom Context When Videoconferencing: A User Experience-Based Qualitative Research on the Use of Cameras | (46) | Universitat Ramon Llull (URL), La Salle, Barcelona, Spain | 18-25 | Undergraduate (79) | 1. Camera use during online learning 2. Interaction (student to student & to instructor), distraction | 1. Anxiety, Stress, Satisfaction (Camera use during online learning)  2. Reduce Cognitive load -due to increase understanding | Quali |
| 12 | Digital Well-Being and Satisfaction of University Students with Online Education | (51) | Faculty of Aeronautics, Technical University of Košice, Slovakia | Not mentioned | Undergraduate (53) | Characteristic of online platform (functionality, interactive features) | Satisfaction | Mixed quanti quali |
| 13 | Exploring the Dimensions of Smartphone Distraction: Development, Validation, Measurement Invariance, and Latent Mean Differences of the Smartphone Distraction Scale (SDS) | (33) | English-speaking university in the United Kingdom (UK) | 21.1 | Undergraduate (730)  &  Postgraduate (95) | Smartphone distraction (problematic smartphone use) | Positive and negative well-being (Item only) | Quanti |
| 14 | Nurturing Minds and Sustainability: An Exploration of Educational Interactions and Their Impact on Student Well-Being and Assessment in a Sustainable University | (47) | STEM (science, technology, engineering, and mathematics) university, Romania | Not mentioned | Undergraduate  (871) | 1. Flexibility - work at own pace 2. fast feedback & correction 3. Interaction 4. Accessibility (internet connection, unresponsive tools, multiple devices) | 1. More engaged -satisfaction (Interaction) 2. Isolated, poor engagement (Interaction) 3. Anxiety - Lack interaction  4. Frustration (Accessibility) | Quanti |
| 15 | Co-Designing AI Agents to Support Social Connectedness Among Online Learners: Functionalities, Social Characteristics, and Ethical Challenges | (45) | Georgia Tech’s Online Master of Science in Computer Science (OMSCS) program, USA | 24-31 | Undergraduate (23) | 1. Characteristic of AI agent in facilitating social connection 2. Goal - Social connection beyond classes / make friends | 1. Discomfort (Characteristic of AI agent) 2. Satisfaction (Goal- Social connection) | Quali, co-design workshop |
| 16 | Examination of non-cognitive variables affecting academic achievement: a conceptual model proposal | (29) | Turkey | 17-48 | Undergraduate (241) | Screen time | No significant relation on psychological wellbeing | Quanti |
| 17 | Chatbot Positive Design to Facilitate Referencing Skills and Improve Digital Well-Being | (41) | Master of Education, King Faisal University, Kingdom of Saudi Arabia | Not mentioned | Postgraduate (150) | 1. Referencing skills (AI)  2. Interaction with AI 3. Facilitating independent / flexibility of chatbot | 1. Satisfaction (Referencing skills AI) 2. Motivation, comfort, peace, happiness (Interaction with AI) | Quanti, experimental study |
| 18 | Raising Awareness of Smartphone Overuse among University Students: A Persuasive Systems Approach | (23) | Portugal | 18-24 | Undergraduate  (16) | Period of smartphone usage | Decrease well-being | Mixed quali quanti |
| 19 | Wellbeing Amid Digital Risks: Implications of Digital Risks, Threats, and Scams on Users’ Wellbeing | (24) | Universities in Norway | Not mentioned | Undergraduate (4)  & Postgraduate (13) | Digital risk:- 1. Physical- muscle overused, tired eyes , postural problems 2. Psychological - addiction, 3. Financial - buying compulsiveness, scam 4. Social - need for attention, acknowledgement, fear of isolation, fear of missing out (GOAL) | Fear of online fraud, mental & emotional friction (Financial) | Quali |
| 20 | Participatory digital approaches to embedding student wellbeing in higher education | (54) | The Open University & University of Warwick, Coventry, United Kingdom. | <25 - >56 (mixed with others) | Interviewed:-Undergraduate (17)  & Undergraduate (13)  Survey:-  584 students | 1. User friendly 2. Variety of pedagogy / learning design | Feel valued (User friendly & variety of pedagogy) | Mixed quali quanti |
| 21 | A study of university law students’ self-perceived digital competences | (42) | Law School within a UK university | Baby boomers - Gen Z | Undergraduate (28)  & Undergraduate (31) | 1. Positive behaviour online 2. Digital Literacy 3. Professionalism / Ethical conduct 4. Digital Competencies | Comfortable, feel safe (Positive behaviour online) | Mixed quanti quali |
| 22 | A cross-sectional study of discipline-based self-perceived digital literacy competencies of nursing students | (43) | Royal College of Nursing, UK | Baby boomers - Gen Z | Undergraduate (146)  &  Postgraduate (36) | Digital literacy | More Adaptable | Mixed quanti quali |
| 23 | The Analysis of Psychological Aspects of Online Education: Depression and Happiness and Their Relationship with College Students’ Academic Achievement | (30) | Kerman University of Medical Sciences, Iran | 22 +- 4 | Undergraduate (400)  &  Postgraduate (110) | Internet addiction | 1. Decrease happiness  2. Depression | Quanti |
| 24 | Assessing stress, protective factors and psychological well-being among undergraduate nursing students | (49) | Bachelor of nursing, Australian regional university | 36.23 | Undergraduate  (538)  &  postgrad experience  (7) | Family support | Motivation | Quanti |
| 25 | Exploring college students’ technostress phenomenon in using ed-tech | (36) | Management study program, private college of economics in Garut, West Java, Indonesia | Not mentioned | Undergraduate (46) | 1. Digital literacy 2. Organization guidance 3. Device compatibility 4. Acquaintances support  5. Intensive technology use | 1. Less stress (Digital literacy & Acquaintances support) 2. Frustration (Device compatibility) 3. Techno-isolation -loneliness (Intensive technology use) | Quali |
| 26 | The relationship of smartphone addiction with psychological distress and neuroticism among university medical students | (25) | Faculty of medicine, USM, Malaysia | 19 - 23 | Medical Undergraduate  (574) | Smartphone addiction | Depression, anxiety, stress and neuroticism | Quanti |
| 27 | Beyond the Buzz: Investigating the Effects of a Notification-Disabling Intervention on Smartphone Behavior and Digital Well-Being | (53) | University of Amsterdam, Netherlands | 24.45 | Mix university students & panel company) (205) | Notification-disabling | Unaffected / not significant | Mixed method, RCT |
| 28 | Digital distraction levels of university students in emergency remote teaching | (34) | Sakarya university, Turkey | 22.75 | Mix undergraduate & postgraduate (1532) | Digital distractions (sending instant messages, controlling the clock, boredom, social media posting, and system usability scores) | lower general satisfaction | Quanti |
| 29 | Factors for Sustainable Online Learning in Higher Education during the COVID-19 Pandemic | (48) | 11 universities in Hong Kong | Not mentioned | Undergraduate (400) | 1. Interaction between students 2. Course design | Satisfaction | Quanti |
| 30 | Technostress and academic motivation: direct and indirect effects on university students’ psychological health | (35) | five European countries (Czech Republic, Greece, Italy, Serbia, United Kingdom) | 22.36 | Undergraduate (1211)  &  Postgraduate (330) | 1. Techno overload 2. Academic motivation 3. Techno-ease, techno-reliability, techno-sociality | 1. Anxiety, depression & amotivation (Techno overload) 2. Increase intrinsic motivation (Techno-ease, academic motivation) | Quanti |
| 31 | Internet Addiction and Academic Anxiety Among Chinese College Students During COVID-19: The Mediating Role of Psychological Contract | (31) | 11 universities and colleges in China | Not mentioned | (270) | 1. Internet addiction 2. Psychological contract (interaction with institution) | Lesser psychological contract then increased academic anxiety (not directly impacted by internet addiction) | Quanti |
| 32 | Social Media Usage and Depressive Symptoms in University Students: A Correlation Study | (32) | 2 public universities in Pakistan | 20-31 | Undergraduate (104)  &  Postgraduate (26) | Social media (no specific factors on social media) | Depression | Quanti |
| 33 | Humanizing Higher Education via Digital Wellbeing with Spiritual Construct | (70) | Malaysia |  |  | Spiritual |  | Expert review |
| 34 | Spiritual Mindfulness-Based Intervention for Nomophobia: A Randomized Controlled trial | (37) | Private university in Yogyakarta, Indonesia | 21-24 | Undergraduate (60) | Spiritual mindfulness, self control skill | Reducing Nomophobia | Quanti, Rct Intervention - practice of zikr + other skills |
| 35 | “I finally felt I had the tools to control these urges”: Empowering Students to Achieve Their Device Use Goals With the Reduce Digital Distraction Workshop | (38) | University of Oxford, UK | 18 - >36 | Undergraduate (98)  &  Postgraduate (182) | 1. Goal setting 2. Digital self-control skills (time, blocking/hide distraction | More aware & mindful | Mixed quanti quali  (feedback post workshop) open trial without control group |
